# Supplementary material for: Awake Venovenous Extracorporeal Membrane Oxygenation for Coronavirus Disease 2019 Acute Respiratory Failure
Source: PubMed Central journal article supplement — Crit Care Explor. 2021 Jul 15;3(7):e0489. doi: 10.1097/CCE.0000000000000489 (PMC8284710; doi:10.1097/cce.0000000000000489), 2021-07-15
Supplement: cc9-3-e0489-s001.pdf [file cc9-3-e0489-s001.pdf]

Supplemental Table 1: Individual patient's characteristics

| # | Age | Sex | Comorbid Disease | Pre-ECMO implantation |                                   |                                      |           |           |                          |      | Duration of ECMO support (days) | Indication for intubation          | Duration of IMV (days) | ICU length of stay (days) | Outcome                      |
|---|-----|-----|------------------|-----------------------|-----------------------------------|--------------------------------------|-----------|-----------|--------------------------|------|---------------------------------|------------------------------------|------------------------|---------------------------|------------------------------|
|   |     |     |                  | SOFA Score            | Consideration for awake           | Respiratory support                  | RR (/min) | P/F ratio | paCO <sub>2</sub> (mmHg) | pH   |                                 |                                    |                        |                           |                              |
| 1 | 49  | F   | DM-2             | 4                     | BMI 31 kg/cm <sup>2</sup>         | HFNC FiO <sub>2</sub> 100%           | 48        | 83        | 32.9                     | 7.44 | 7                               | Hypoxemia (PF ratio 56.1)          | 8                      | 13                        | Intubated<br>Discharged home |
| 2 | 39  | M   | MD-1             | 6                     | Neuromuscular disease             | BiPAP 10/10<br>FiO <sub>2</sub> 100% | 24        | 60        | 62.7                     | 7.32 | 15                              | Not intubated                      | 0                      | 27                        | Discharged home              |
| 3 | 75  | F   | DM-2, HTN        | 4                     | Severity of pulmonary infiltrates | HFNC FiO <sub>2</sub> 100%           | 27        | 58        | 44.9                     | 7.34 | 32                              | Secretion obstruction and delirium | 23                     | 33                        | Intubated<br>Died in ICU     |
| 4 | 67  | M   | HTN              | 3                     | BMI 29 kg/cm <sup>2</sup>         | BiPAP 8/9<br>FiO <sub>2</sub> 70%    | 36        | 101       | 45                       | 7.37 | 25                              | Delirium and hypoxemia (PF 68.5)   | 46                     | 56                        | Intubated<br>Discharged home |
| 5 | 59  | M   | DM-2             | 4                     | Severity of pulmonary infiltrates | HFNC FiO <sub>2</sub> 100%           | 30        | 52        | 36                       | 7.44 | 11                              | Not intubated                      | 0                      | 15                        | Discharged home              |
| 6 | 52  | M   | None             | 4                     | Refused intubation                | HFNC FiO <sub>2</sub> 100%           | 30        | 103       | 37.2                     | 7.46 | 39                              | Delirium and hypoxemia (PF 69.1)   | 52                     | 69                        | Intubated<br>Discharged home |
| 7 | 55  | F   | MG               | 4                     | Neuromuscular disease             | BiPAP 15/8<br>FiO <sub>2</sub> 90%   | 46        | 76        | 41.8                     | 7.44 | 7                               | Not intubated                      | 0                      | 13                        | Discharged home              |

Abbreviations: DM-2 = type 2 diabetes mellitus, MD-1 = muscular dystrophy type 1, HTN = hypertension, MG = myasthenia gravis  
 BMI = body mass index, HFNC = high flow nasal cannula, BiPAP = Bi-level positive pressure ventilation, P/F = PaO<sub>2</sub>/FiO<sub>2</sub>, IMV = invasive mechanical ventilation, ICU = intensive care unit
